# Supplementary material for: The Genetic Architecture of Methotrexate Toxicity Is Similar in Drosophila melanogaster and Humans
Source: PubMed Central journal article supplement (PMC3737169; doi:10.1534/g3.113.006619), 2013-08-01
Supplement: supp_g3.113.006619_006619SI.pdf [file supp_g3.113.006619_006619SI.pdf]

**The genetic architecture of methotrexate toxicity is similar in *Drosophila melanogaster* and humans.**

Authors: Galina Kislukhin\*<sup>1</sup>, Elizabeth G. King\*<sup>1,3</sup>, Kelli N. Walters<sup>1</sup>, Stuart J. Macdonald<sup>2</sup>, Anthony D. Long<sup>1</sup>  
\*Co-first Authors

<sup>1</sup>University of California, Irvine, Department of Ecology and Evolutionary Biology, Irvine, CA 92697-2525, and <sup>2</sup>University of Kansas, Department of Molecular Biosciences, Lawrence, KS 66045

<sup>3</sup>Corresponding Author: University of California, Irvine, Department of Ecology and Evolutionary Biology, Irvine, CA 92697-2525.  
E-mail: [egking@uci.edu](mailto:egking@uci.edu)

DOI: 10.1534/g3.113.006619

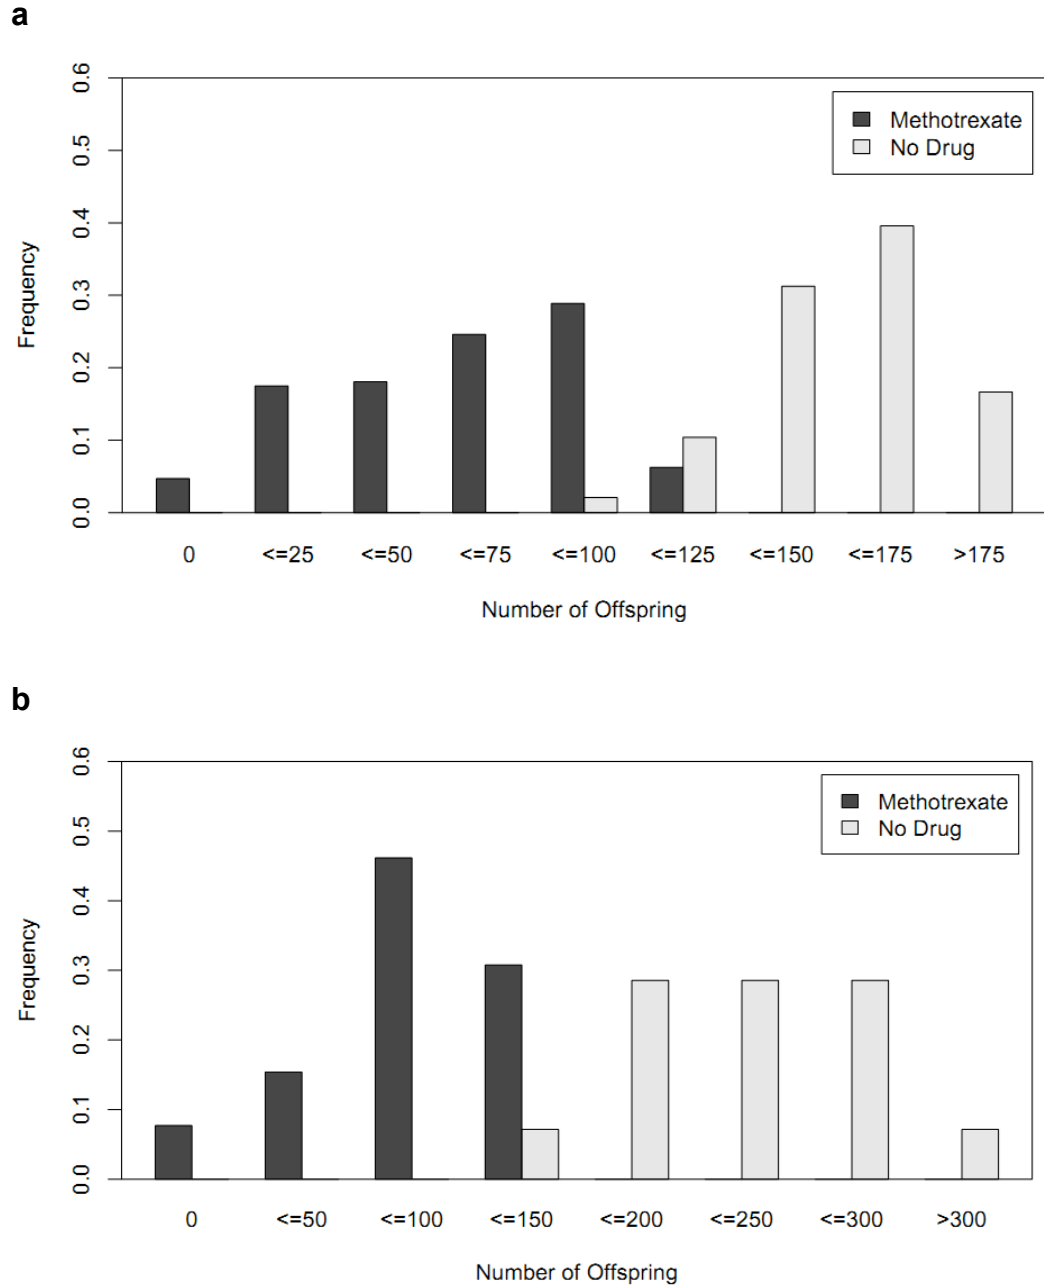

**Figure S1** Saturation and total percent knockdown. **a)** Saturation: A “no drug” treatment was carried out in fly condos in order to assess the saturation point of the condo wells. A total of 48 wells were filled with 5 pairs of flies each, and allowed to lay eggs for 2 days. In two weeks, the number of offspring was counted and compared to the number of offspring produced by all RIL crosses of the MTX-treated assay. **b)** Percent knock-down: 16 genotypes were treated using our standard dosing protocol in condos. Three treated sets of 3 males and 3 females per genotype were then allowed to lay eggs for 48 hours in condos. One mock treated set of 3 males and 3 females per genotype were also allowed to lay eggs in bottles for 48 hours. We compare the mean of each treated genotype (dark grey) to the same genotype from the mock-treated fecundity assayed in half-pint round-bottom glass stock bottles (light grey).

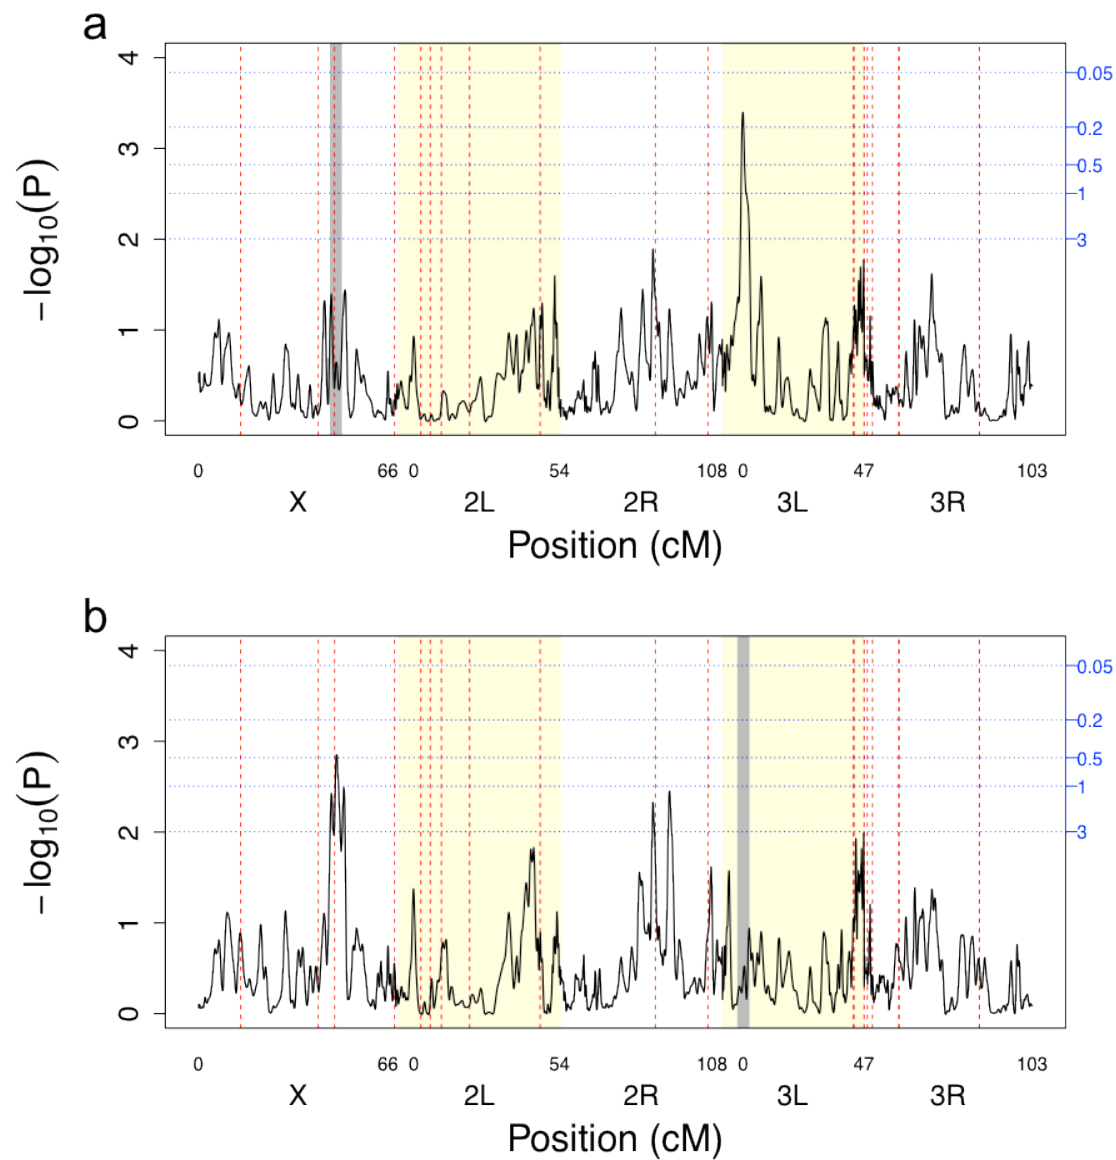

**Figure S2** Residual methotrexate toxicity genome scans adjusting for **a)** QTL A and **b)** QTL C. The grey vertical bar indicates the region within 2cM of the QTL corrected for and therefore where results should be interpreted with caution. Horizontal blue dotted lines indicate thresholds for various false positive rates (number of expected peaks per genome scan) noted on the right y-axis. Vertical dashed red lines indicate the location of fly orthologs of previously identified human candidate genes for methotrexate toxicity.

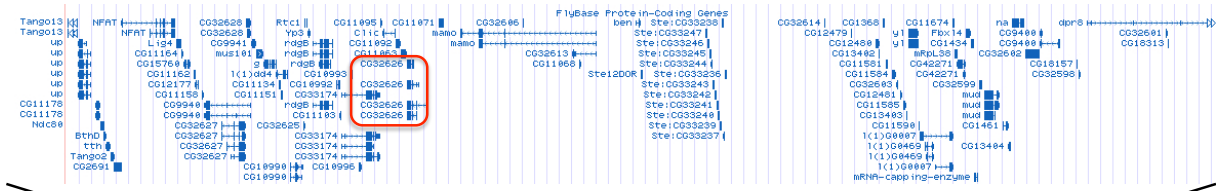

AMPD1

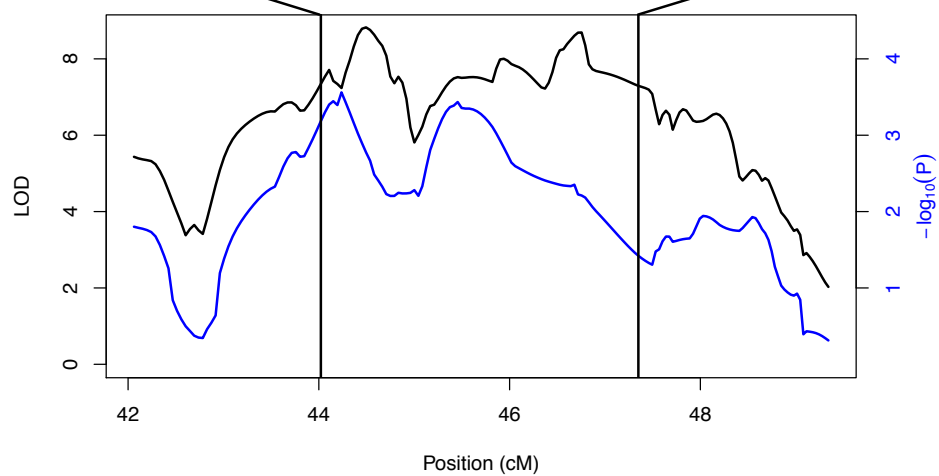

QTL A

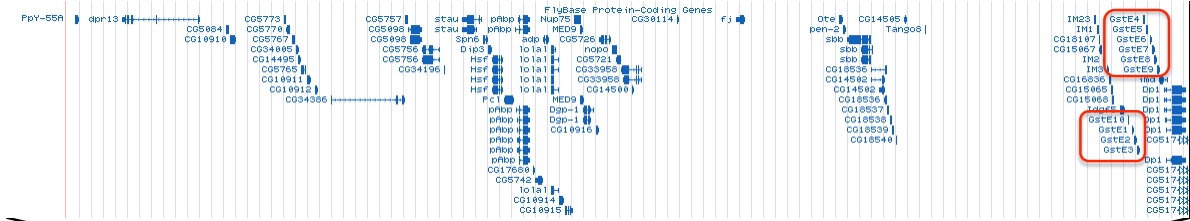

GST E1-10

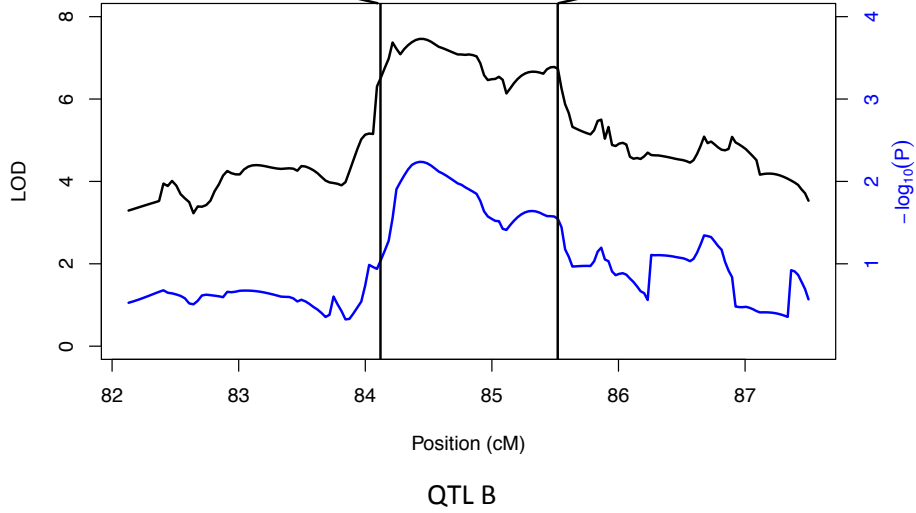

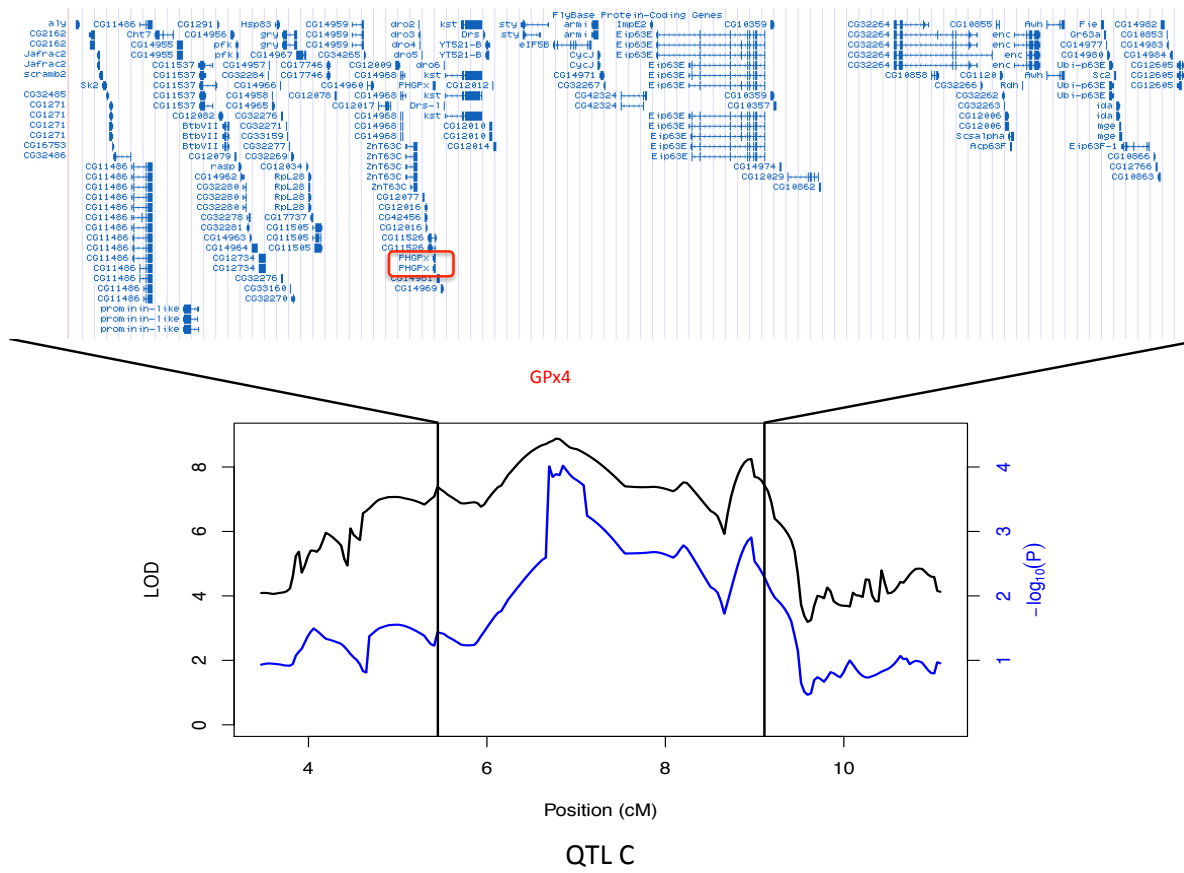

**Figure S3** Santa Cruz Genome Browser for Bayesian Credible Intervals (Table 1) for QTLs A-C. QTL D spans a centromere so is poorly resolved. For QTLs A&B the *Drosophila* orthologs of a priori human candidate genes is circled in red with the associated human gene name also in red. For QTL C the novel candidate gene is circled in red, with the associated human genes name also given.

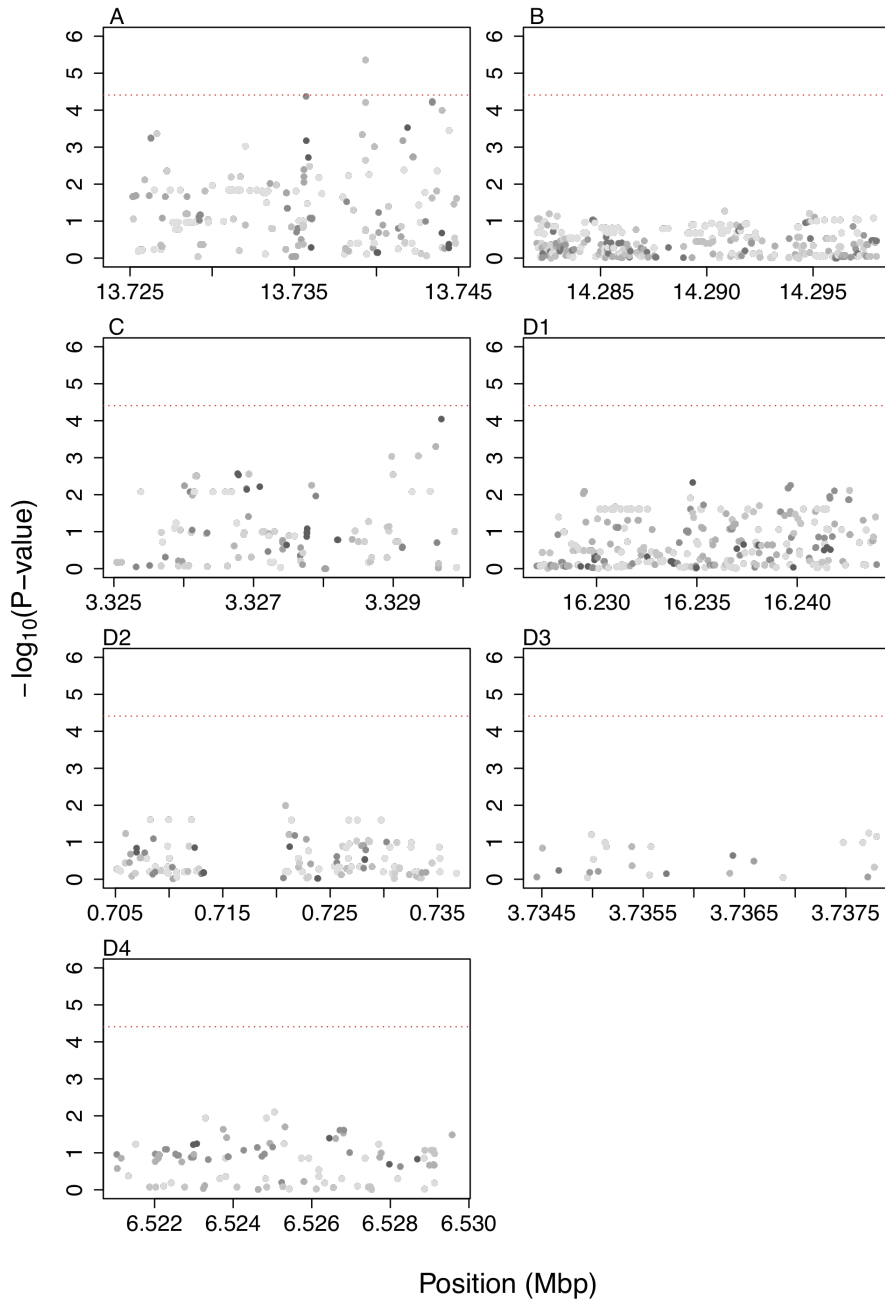

**Figure S4** Association scans with MTX toxicity for all SNPs in candidate genes listed in Supplementary Table 3. Red threshold is Bonferroni over all seven candidate gene regions. Symbols are shaded by minor allele frequency in founders represented in RIL panel such that darker circles are more common SNPs. The large gap in D2 is a Gypsy family transposable element present in the reference strain at that position (hence that region is masked in the founders).

**a**

```
A1 GTTGTNNNNNNNNNNNNNNNNNNNNNNNNNNNNNNNNNNNNNNNNNNNNNNAGCAAGATGATCGAATTTG
A2 GTTGTNNNNNNNNNNNNNNNNNNNNNNNNNNNNNNNNNNNNNNNNNNNNNGCAAGCAAGATGATCGAATTTG
A3 GTTGTTTAGGTGTAGAGGGGGGGGGGGGGGGTGTGGTTGCAAGCAAGATGATCGAATTTG
A4 GTTGTTTAGGTGTAGAGGGGGGGGGGGGGGGTGTGGTTGCAAGCAAGATGATCGAATTTG
A5 GTTGTTTAGGTNNNNNNNNNNNNNNNNNNNNNNNNNNNNNNNNNNNNNNNGCAAGATGATCGAATTTG
A6 GTTGTTTAGGTGTAGAGGGGGGGGGGGGGGGTGTGGTTGCAAGCAAGATGATCGAATTTG
A7 GTTGTTTANNNNNNNNNNNNNNNNNNNNNNNNNNNNNNNNNNNNNNNNGCAAGCAAGATGATCGAATTTG
AB8 GNNNNNNNNNNNNNNNNNNNNNNNNNNNNNNNNNNNNNNNNNNNNNGCAAGCAAGATGATCGAATTTG
B1 GTTGNNNNNNNNNNNNNNNNNNNNNNNNNNNNNNNNNNNNNNNNNNNGCAAGCAAGATGATCGAATTTG
B2 GTTGTTTAGGTGTAGAGGGGGGGGGGGGGGGTGTGGTTGCAAGCAAGATGATCGAATTTG
B3 GKTGTTTAGGTGTAGAGGGGGGGGGGGGGGGTGTGGTTGCAAGCAAGATGATCGAATTTG
B4 GTTGNNNNNNNNNNNNNNNNNNNNNNNNNNNNNNNNNNNNNNNNNGCAAGATGATCGAATTTG
B5 GTTGTTTAGGTGTAGAGGGGGGGGGGGGGGGTGTGGTTGCAAGCAAGATGATCGAATTTG
B6 GNNNNNNNNNNNNNNNNNNNNNNNNNNNNNNNNNNNNNNNNNNNGGGTGTGGTTGCAAGCAAGATGATCGAATTTG
B7 GTTGTTTAGGTGTAGAGGGGGGGGGGGGGGGTGTGGTTGCAAGCAAGATGATCGAATTTG
```

**b**

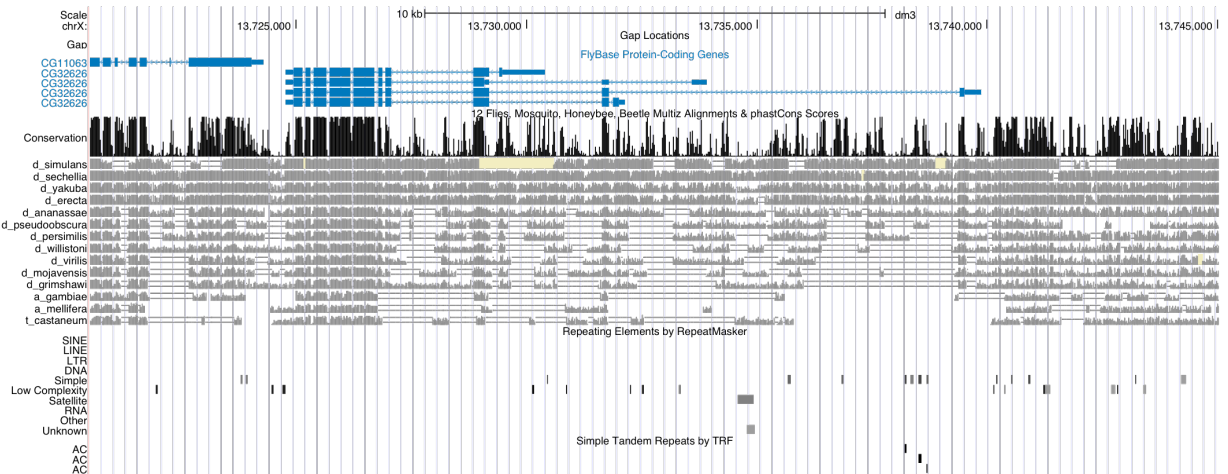

**Figure S5 a)** Alignment of INDEL polymorphism immediately downstream of exon 1 of CG32626 (the candidate gene for QTL A). The region depicted is the reverse complement of X:13739300-13739360, we reverse complement so the DNA sequence is in the same orientation as transcription. **b)** Santa Cruz Genome Browser screen shot of CG32626 showing four putative alternate first exons.



**Table S1 Recovery and “lay-out” Fly Food**

| Ingredient       | Amount <sup>1</sup> |
|------------------|---------------------|
| Water            | 78.4 ml             |
| Agar             | 0.84 g              |
| Dextrose         | 6.31 g              |
| Sucrose          | 3.423 g             |
| K, Na Tartrate   | 0.96 g              |
| calcium chloride | 0.07 g              |
| corn meal        | 7.6 g               |
| Yeast suspension |                     |
| -yeast           | 3.2 g               |
| -water           | 20 ml               |
| Propionic acid   | 1.6 ml              |
| Tegosept         |                     |
| -tegosept        | 0.1 g               |
| -ethanol         | 1 ml                |

---

1. For a total of 100 ml

**Table S2 Methotrexate *a priori* identified polymorphisms**

| Human Gene | Polymorphism <sup>1</sup> | Ortholog Type <sup>2</sup> | Fly Gene(s) <sup>2</sup> | References                                            |
|------------|---------------------------|----------------------------|--------------------------|-------------------------------------------------------|
| ABCC2      | C24T                      | Many:1                     | MRP                      | Rau, <i>et al.</i> 2006                               |
| AMPD1      | C34T                      | Many:1                     | CG32626                  | Wessels, <i>et al.</i> 2006                           |
| ATIC       | C347G                     | 1:1                        | CG11089                  | Wessels, <i>et al.</i> 2006                           |
| ITPA       | C94A                      | 1:1                        | CG8891                   | Wessels, <i>et al.</i> 2006                           |
| MTHFR      | C677T                     | No Ortholog                |                          | Vella <i>et al.</i> 2011, Kotnik <i>et al.</i> 2011,  |
|            | A1298C                    |                            |                          | Kurzwaski <i>et al.</i> 2007, Seidemann <i>et al.</i> |
|            | A80G                      |                            |                          | 2006, Hughes <i>et al.</i> 2006                       |
| RFC-1      | G80A                      | 1:1                        | Gnf1                     | Drozdik <i>et al.</i> 2007.                           |
| SLCO1B1    | 3 nsSNPs <sup>3</sup>     | No Ortholog                |                          | Ramsey, <i>et al.</i> 2012                            |
| GSTT1/     | Complex <sup>4</sup>      | Function                   | GstD1-10 <sup>5</sup>    | Imanishi, <i>et al.</i> 2007                          |
| GSTM1/     |                           | Function                   | GstE1-10 <sup>5</sup>    |                                                       |
| GSTP1      |                           |                            |                          |                                                       |
| FPGS       | Pathway                   | 1:Many                     | CG2543                   | Mikkelsen <i>et al.</i> 2011                          |
|            | Pathway                   | 1:Many                     | CG31773                  | Mikkelsen <i>et al.</i> 2011                          |
| GGH        | Pathway                   | 1:Many                     | CG32154                  | Mikkelsen <i>et al.</i> 2011                          |
|            | Pathway                   | 1:Many                     | CG32155                  | Mikkelsen <i>et al.</i> 2011                          |
| TYMS       | Pathway                   | 1:1                        | Ts                       | Mikkelsen <i>et al.</i> 2011                          |
| DHFR       | Pathway                   | Many:1                     | Dhfr                     | Mikkelsen <i>et al.</i> 2011                          |
| CBS        | Pathway                   | 1:1                        | CG1753                   | Mikkelsen <i>et al.</i> 2011                          |
| MTHFR      | Pathway                   | No Ortholog                |                          | Mikkelsen <i>et al.</i> 2011                          |
| MTR        | Pathway                   | No Ortholog                |                          | Mikkelsen <i>et al.</i> 2011                          |
| MTRR       | Pathway                   | 1:1                        | CG14882                  | Mikkelsen <i>et al.</i> 2011                          |
| SHMT1      | Pathway                   | Many:1                     | CG3011                   | Mikkelsen <i>et al.</i> 2011                          |
| MTHFD1     | Pathway                   | Many:1                     | pug                      | Mikkelsen <i>et al.</i> 2011                          |
| MTHFS      | Pathway                   | Many:1                     | CG34424                  | Mikkelsen <i>et al.</i> 2011                          |
| PPAT       | Pathway                   | Many:1                     | Prat                     | Mikkelsen <i>et al.</i> 2011                          |
| GART       | Pathway                   | 1:1                        | ade3                     | Mikkelsen <i>et al.</i> 2011                          |
| ATIC       | Pathway                   | 1:1                        | CG11089                  | Mikkelsen <i>et al.</i> 2011                          |
| ADA        | Pathway                   | No Ortholog                |                          | Mikkelsen <i>et al.</i> 2011                          |

1. Polymorphism refers either to a SNP within a gene (SNP resulting in amino acid substitution given) or “pathway” indicates that the gene is in the MTX cellular pathway based on the literature (but that gene does not harbor a germline SNP impacting toxicity).
2. Ortholog types and gene names are represented as on the ensemble.org genome browser (Birney *et al.* 2004)
3. Three non-synonymous SNPs were examined, all had measurable effects
4. A nsSNP in GstP1 may impact toxicity, a presence/absence polymorphism for GstM1 may mediate the impact of RFC1 on toxicity.
5. Gene family. The orthology prediction is based on both human and fly GST gene families having the same apparent biochemical function

**Table S3 Candidate genes associated with QTL peaks of Figure 3A and Table 1.**

| QTL | Gene Name        | Chr | Left <sup>1</sup> | Right <sup>1</sup> | nsSNP <sup>2</sup> | SNPs <sup>2</sup> | TEs <sup>2,3</sup> |
|-----|------------------|-----|-------------------|--------------------|--------------------|-------------------|--------------------|
| A   | <i>CG32626</i>   | X   | 13724             | 13745              | 1                  | 233               | 1{A6}              |
| B   | <i>GstE1-E10</i> | 2R  | 14282             | 14298              | 43                 | 340               | 2{B2},{A1}         |
| C   | <i>PHGPx</i>     | 3L  | 3325              | 3330               | 5                  | 116               | 0                  |
| D1  | <i>CG32154/5</i> | 3L  | 16227             | 16244              | 14                 | 318               | 1{B3}              |
| D2  | <i>Gnf1</i>      | 3R  | 705               | 737                | 8                  | 136               | 0                  |
| D3  | <i>Prat</i>      | 3R  | 3734              | 3738               | 1                  | 29                | 0                  |
| D4  | <i>pug</i>       | 3R  | 6521              | 6530               | 12                 | 111               | 0                  |

1. Method for determining Left and Right limits of candidate genes defined in Materials and Methods. Coordinates are given in kilobases.
2. Number of non-synonymous SNPs, other SNPs in the gene region, and transposable elements.
3. All transposable elements were only present in a single founder. Founder line harboring TE in {}.

**Table S4 Biallelic SNPs significant a  $p < 0.001$  from gene-centric association scans.**

| QTL | chr | base     | %V <sub>T</sub> | P       | %V <sub>G</sub> | MiAC | MaAC |
|-----|-----|----------|-----------------|---------|-----------------|------|------|
| A   | X   | 13726279 | 3.86%           | 5.5E-04 | 6.03%           | 5    | 7    |
| A   | X   | 13726288 | 3.84%           | 5.7E-04 | 6.00%           | 5    | 7    |
| A   | X   | 13726642 | 4.01%           | 4.3E-04 | 6.26%           | 2    | 10   |
| A   | X   | 13732029 | 3.54%           | 9.3E-04 | 5.54%           | 1    | 11   |
| A   | X   | 13735714 | 5.38%           | 4.2E-05 | 8.40%           | 7    | 5    |
| A   | X   | 13735738 | 3.76%           | 6.5E-04 | 5.87%           | 6    | 6    |
| A   | X   | 13739146 | 3.98%           | 4.5E-04 | 6.21%           | 3    | 9    |
| A   | X   | 13739343 | 5.15%           | 6.1E-05 | 8.05%           | 3    | 9    |
| A   | X   | 13739344 | 6.72%           | 4.3E-06 | 10.50%          | 3    | 9    |
| A   | X   | 13739888 | 3.53%           | 9.5E-04 | 5.52%           | 3    | 9    |
| A   | X   | 13741615 | 3.75%           | 6.6E-04 | 5.85%           | 4    | 8    |
| A   | X   | 13741897 | 4.22%           | 3.0E-04 | 6.60%           | 6    | 6    |
| A   | X   | 13743413 | 5.18%           | 5.8E-05 | 8.10%           | 5    | 7    |
| A   | X   | 13743414 | 5.15%           | 6.2E-05 | 8.05%           | 5    | 7    |
| A   | X   | 13744000 | 4.87%           | 1.0E-04 | 7.60%           | 3    | 9    |
| A   | X   | 13744431 | 4.13%           | 3.5E-04 | 6.45%           | 1    | 11   |
| C   | 3L  | 3328980  | 3.57%           | 9.0E-04 | 5.58%           | 3    | 11   |
| C   | 3L  | 3329361  | 3.57%           | 8.9E-04 | 5.58%           | 3    | 11   |
| C   | 3L  | 3329612  | 3.92%           | 5.0E-04 | 6.12%           | 4    | 10   |
| C   | 3L  | 3329692  | 4.94%           | 8.9E-05 | 7.71%           | 7    | 7    |

Note: QTL corresponds to QTL in Supplementary Table 3, chr=chromosome, base=base position in chromosome, %V<sub>T</sub>=percent of total variation explained by SNP, P=p-value, %V<sub>G</sub>=percent of genetic variation explained by SNP, MiAC= Minor Allele Count = Number of founder chromosomes having minor allele represented in panel at this position, MaAC=Major Allele Count. Shaded rows are most significant SNP in each gene (SNP under QTL A is Bonferroni significant over all 7 candidate gene regions, SNP under QTL C is not-Bonferroni significant). The other 5 genes had no SNPs significant at  $p < 0.001$ .

### References appearing only in supporting information

- Drozdziak M., Rudas T., Pawlik A., Gornik W., Kurzawski M., et al., 2007 Reduced folate carrier-1 80G>A polymorphism affects methotrexate treatment outcome in rheumatoid arthritis. *Pharmacogenomics J.* 7(6): 404-7.
- Hughes L. B., Beasley T. M., Patel H., Tiwari H. K., Morgan S. L., et al., 2006 Racial or ethnic differences in allele frequencies of single-nucleotide polymorphisms in the methylenetetrahydrofolate reductase gene and their influence on response to methotrexate in rheumatoid arthritis. *Ann. Rheum. Dis.* 65(9): 1213-8.
- Kotnik B., Grabnar I., Grabar P., Dolzan V., Jazbec J., 2011 Association of genetic polymorphism in the folate metabolic pathway with methotrexate pharmacokinetics and toxicity in childhood acute lymphoblastic leukaemia and malignant lymphoma. *Eur. J. Clin. Pharmacol.* 67(10): 993-1006.
- Kurzawski M., Pawlik A., Safranow K., Herczynska M., Drozdziak M., 2007 677C>T and 1298A>C MTHFR polymorphisms affect methotrexate treatment outcome in rheumatoid arthritis. *Pharmacogenomics* 8(11): 1551-9.
- Ramsey L. B., Panetta J. C., Smith C., Yang W., Fan Y., Winick N. J., Martin P. L., Cheng C., Devidas M., Pui C. H., Evans W. E., Hunger S. P., Loh M., Relling M. V., 2012 Genome-wide study of methotrexate clearance replicates SLCO1B1. *Blood* 121(6): 898-904.
- Rau T., Erney B., Gores R., Eschenhagen T., Beck J., Langer T., 2006 High-dose methotrexate in pediatric acute lymphoblastic leukemia: impact of ABCC2 polymorphisms on plasma concentrations. *Clin Pharmacol Ther* 80(5): 468-76.
