# Supplementary material for: The Genetic Architecture of Methotrexate Toxicity Is Similar in Drosophila melanogaster and Humans
Source: PubMed Central journal article supplement (PMC3737169; doi:10.1534/g3.113.006619), 2013-08-01
Supplement: supp_g3.113.006619_FigureS3.pdf [file supp_g3.113.006619_FigureS3.pdf]

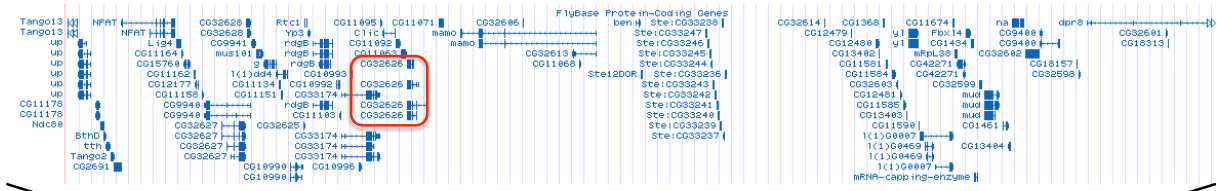

AMPD1

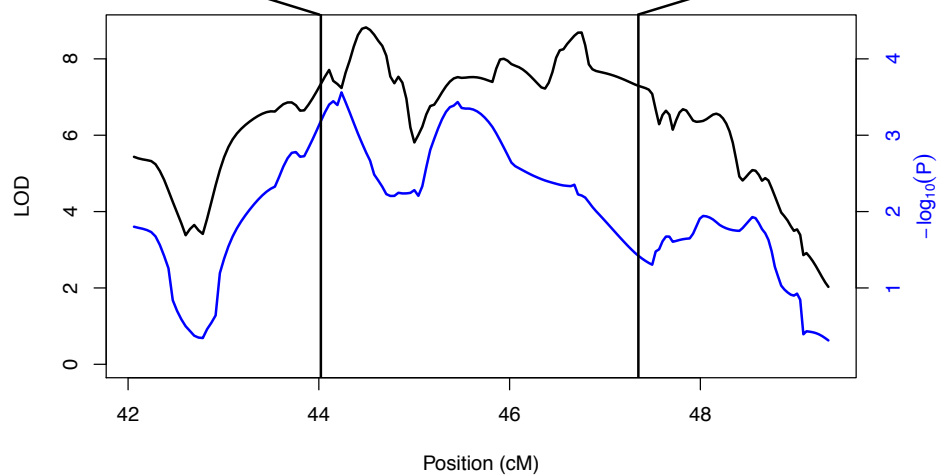

QTL A



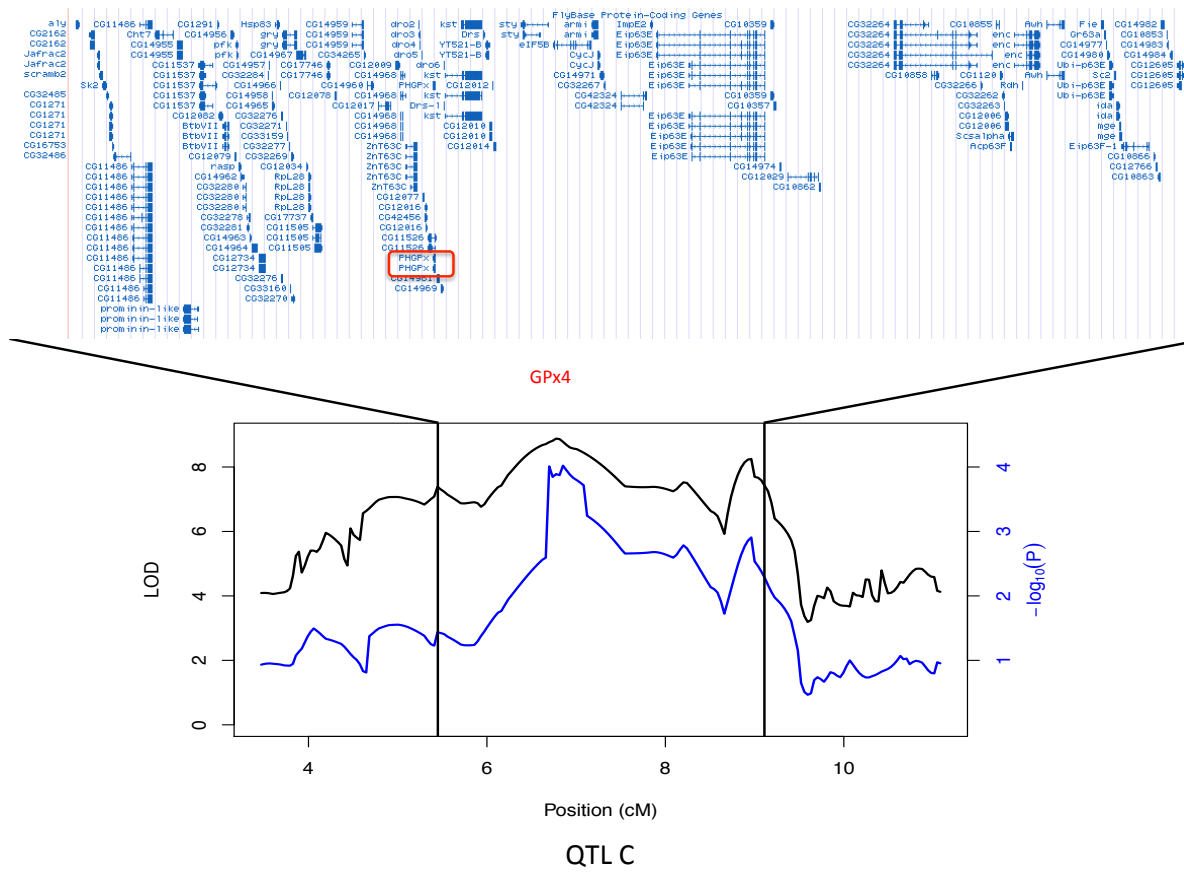

**Figure S3** Santa Cruz Genome Browser for Bayesian Credible Intervals (Table 1) for QTLs A-C. QTL D spans a centromere so is poorly resolved. For QTLs A&B the *Drosophila* orthologs of a priori human candidate genes is circled in red with the associated human gene name also in red. For QTL C the novel candidate gene is circled in red, with the associated human genes name also given.
