# Supplementary material for: The Genetic Architecture of Methotrexate Toxicity Is Similar in Drosophila melanogaster and Humans
Source: PubMed Central journal article supplement (PMC3737169; doi:10.1534/g3.113.006619), 2013-08-01
Supplement: supp_g3.113.006619_FigureS5.pdf [file supp_g3.113.006619_FigureS5.pdf]

**a**

```
A1 GTTGTNNNNNNNNNNNNNNNNNNNNNNNNNNNNNNNNNNNNNNNNNNNNNNAGCAAGATGATCGAATTTG
A2 GTTGTNNNNNNNNNNNNNNNNNNNNNNNNNNNNNNNNNNNNNNNNNNNNNGCAAGCAAGATGATCGAATTTG
A3 GTTGTTTAGGTGTAGAGGGGGGGGGGGGGGGGGTGTGGTTGCAAGCAAGATGATCGAATTTG
A4 GTTGTTTAGGTGTAGAGGGGGGGGGGGGGGGGGTGTGGTTGCAAGCAAGATGATCGAATTTG
A5 GTTGTTTAGGTNNNNNNNNNNNNNNNNNNNNNNNNNNNNNNNNNNNNNNNNNGCAAGATGATCGAATTTG
A6 GTTGTTTAGGTGTAGAGGGGGGGGGGGGGGGGGTGTGGTTGCAAGCAAGATGATCGAATTTG
A7 GTTGTTTANNNNNNNNNNNNNNNNNNNNNNNNNNNNNNNNNNNNNNNNNNGCAAGCAAGATGATCGAATTTG
AB8 GNNNNNNNNNNNNNNNNNNNNNNNNNNNNNNNNNNNNNNNNNNNNNGCAAGCAAGATGATCGAATTTG
B1 GTTGNNNNNNNNNNNNNNNNNNNNNNNNNNNNNNNNNNNNNNNNNNNGCAAGCAAGATGATCGAATTTG
B2 GTTGTTTAGGTGTAGAGGGGGGGGGGGGGGGGGTGTGGTTGCAAGCAAGATGATCGAATTTG
B3 GKTGTTTAGGTGTAGAGGGGGGGGGGGGGGGGGTGTGGTTGCAAGCAAGATGATCGAATTTG
B4 GTTGNNNNNNNNNNNNNNNNNNNNNNNNNNNNNNNNNNNNNNNNNGCAAGATGATCGAATTTG
B5 GTTGTTTAGGTGTAGAGGGGGGGGGGGGGGGGGTGTGGTTGCAAGCAAGATGATCGAATTTG
B6 GNNNNNNNNNNNNNNNNNNNNNNNNNNNNNNNNNNNNNNNNNGGGTGTGGTTGCAAGCAAGATGATCGAATTTG
B7 GTTGTTTAGGTGTAGAGGGGGGGGGGGGGGGGGTGTGGTTGCAAGCAAGATGATCGAATTTG
```

**b**

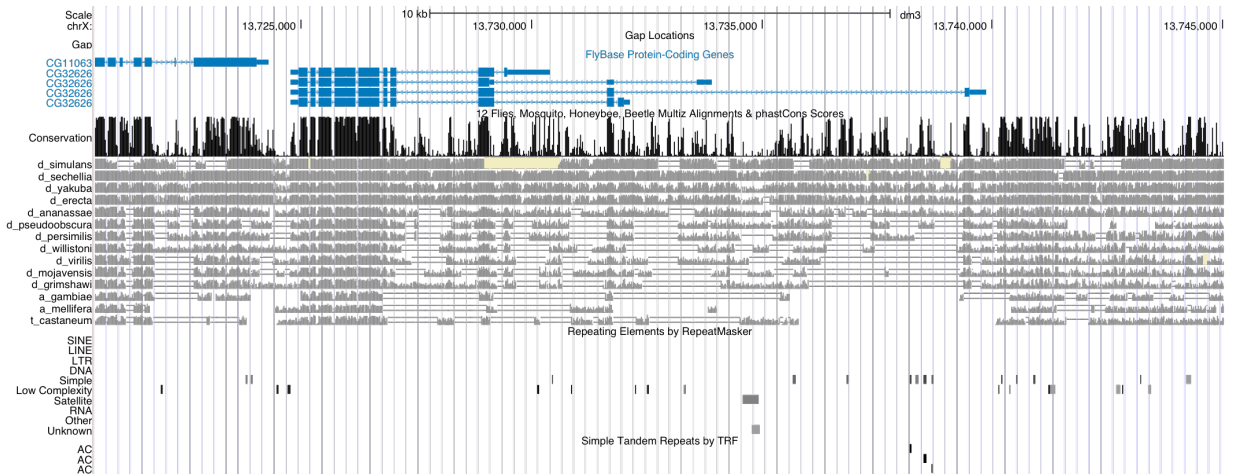

**Figure S5 a)** Alignment of INDEL polymorphism immediately downstream of exon 1 of CG32626 (the candidate gene for QTL A). The region depicted is the reverse complement of X:13739300-13739360, we reverse complement so the DNA sequence is in the same orientation as transcription. **b)** Santa Cruz Genome Browser screen shot of CG32626 showing four putative alternate first exons.
