# Supplementary material for: The Genetic Architecture of Methotrexate Toxicity Is Similar in Drosophila melanogaster and Humans
Source: PubMed Central journal article supplement (PMC3737169; doi:10.1534/g3.113.006619), 2013-08-01
Supplement: supp_g3.113.006619_TableS3.pdf [file supp_g3.113.006619_TableS3.pdf]

**Table S3 Candidate genes associated with QTL peaks of Figure 3A and Table 1.**

| QTL | Gene Name        | Chr | Left <sup>1</sup> | Right <sup>1</sup> | nsSNP <sup>2</sup> | SNPs <sup>2</sup> | TEs <sup>2,3</sup> |
|-----|------------------|-----|-------------------|--------------------|--------------------|-------------------|--------------------|
| A   | <i>CG32626</i>   | X   | 13724             | 13745              | 1                  | 233               | 1{A6}              |
| B   | <i>GstE1-E10</i> | 2R  | 14282             | 14298              | 43                 | 340               | 2{B2},{A1}         |
| C   | <i>PHGPx</i>     | 3L  | 3325              | 3330               | 5                  | 116               | 0                  |
| D1  | <i>CG32154/5</i> | 3L  | 16227             | 16244              | 14                 | 318               | 1{B3}              |
| D2  | <i>Gnf1</i>      | 3R  | 705               | 737                | 8                  | 136               | 0                  |
| D3  | <i>Prat</i>      | 3R  | 3734              | 3738               | 1                  | 29                | 0                  |
| D4  | <i>pug</i>       | 3R  | 6521              | 6530               | 12                 | 111               | 0                  |

1. Method for determining Left and Right limits of candidate genes defined in Materials and Methods. Coordinates are given in kilobases.
2. Number of non-synonymous SNPs, other SNPs in the gene region, and transposable elements.
3. All transposable elements were only present in a single founder. Founder line harboring TE in {}.
