# Supplementary material for: The Genetic Architecture of Methotrexate Toxicity Is Similar in Drosophila melanogaster and Humans
Source: PubMed Central journal article supplement (PMC3737169; doi:10.1534/g3.113.006619), 2013-08-01
Supplement: supp_g3.113.006619_TableS4.pdf [file supp_g3.113.006619_TableS4.pdf]

**Table S4 Biallelic SNPs significant a  $p < 0.001$  from gene-centric association scans.**

| QTL | chr | base     | %V <sub>T</sub> | P       | %V <sub>G</sub> | MiAC | MaAC |
|-----|-----|----------|-----------------|---------|-----------------|------|------|
| A   | X   | 13726279 | 3.86%           | 5.5E-04 | 6.03%           | 5    | 7    |
| A   | X   | 13726288 | 3.84%           | 5.7E-04 | 6.00%           | 5    | 7    |
| A   | X   | 13726642 | 4.01%           | 4.3E-04 | 6.26%           | 2    | 10   |
| A   | X   | 13732029 | 3.54%           | 9.3E-04 | 5.54%           | 1    | 11   |
| A   | X   | 13735714 | 5.38%           | 4.2E-05 | 8.40%           | 7    | 5    |
| A   | X   | 13735738 | 3.76%           | 6.5E-04 | 5.87%           | 6    | 6    |
| A   | X   | 13739146 | 3.98%           | 4.5E-04 | 6.21%           | 3    | 9    |
| A   | X   | 13739343 | 5.15%           | 6.1E-05 | 8.05%           | 3    | 9    |
| A   | X   | 13739344 | 6.72%           | 4.3E-06 | 10.50%          | 3    | 9    |
| A   | X   | 13739888 | 3.53%           | 9.5E-04 | 5.52%           | 3    | 9    |
| A   | X   | 13741615 | 3.75%           | 6.6E-04 | 5.85%           | 4    | 8    |
| A   | X   | 13741897 | 4.22%           | 3.0E-04 | 6.60%           | 6    | 6    |
| A   | X   | 13743413 | 5.18%           | 5.8E-05 | 8.10%           | 5    | 7    |
| A   | X   | 13743414 | 5.15%           | 6.2E-05 | 8.05%           | 5    | 7    |
| A   | X   | 13744000 | 4.87%           | 1.0E-04 | 7.60%           | 3    | 9    |
| A   | X   | 13744431 | 4.13%           | 3.5E-04 | 6.45%           | 1    | 11   |
| C   | 3L  | 3328980  | 3.57%           | 9.0E-04 | 5.58%           | 3    | 11   |
| C   | 3L  | 3329361  | 3.57%           | 8.9E-04 | 5.58%           | 3    | 11   |
| C   | 3L  | 3329612  | 3.92%           | 5.0E-04 | 6.12%           | 4    | 10   |
| C   | 3L  | 3329692  | 4.94%           | 8.9E-05 | 7.71%           | 7    | 7    |

Note: QTL corresponds to QTL in Supplementary Table 3, chr=chromosome, base=base position in chromosome, %V<sub>T</sub>=percent of total variation explained by SNP, P=p-value, %V<sub>G</sub>=percent of genetic variation explained by SNP, MiAC= Minor Allele Count = Number of founder chromosomes having minor allele represented in panel at this position, MaAC=Major Allele Count. Shaded rows are most significant SNP in each gene (SNP under QTL A is Bonferroni significant over all 7 candidate gene regions, SNP under QTL C is not-Bonferroni significant). The other 5 genes had no SNPs significant at  $p < 0.001$ .
